# Supplementary material
Source: PubMed Central journal article supplement (PMC4958201)
Supplement: AAC.03003-15_zac008165406so1.pdf [file AAC.03003-15_zac008165406so1.pdf]

## **Dimethyl sulfoxide protects *Escherichia coli* from rapid antimicrobial-mediated killing**

Hongfei Mi<sup>1,2#</sup>, Dai Wang<sup>1#</sup>, Yunxin Xue<sup>1</sup>, Zhi Zhang<sup>1</sup>, Jianjun Niu<sup>1,2,3\*</sup>, Yuzhi Hong<sup>4</sup>, Karl Drlica<sup>4</sup> and Xilin Zhao<sup>1,4\*</sup>

<sup>1</sup>State Key Laboratory of Molecular Vaccinology and Molecular Diagnostics, School of Public Health, Xiamen University, South Xiang-An Road, Xiang-An District, Xiamen, Fujian Province 361102, China

<sup>2</sup>School of Public Health, Fujian Medical University, Xueyuan Road, Minhou District, Fuzhou, Fujian Province 350108, China

<sup>3</sup>Zhongshan Hospital, Affiliated Hospital of Xiamen University Medical School, South Hubin Road, Siming District, Xiamen, Fujian Province 361004, China

<sup>4</sup>Public Health Research Institute and Department of Microbiology, Biochemistry, and Molecular Genetics, New Jersey Medical School, Rutgers Biomedical and Health Sciences, 225 Warren Street, Newark, NJ 07103, USA

### **SUPPLEMENTAL MATERIAL**

#### **Two figures:**

Figure S1. DMSO has little effect on bacterial growth

Figure S2. Increased incubation time and drug concentration diminish DMSO-mediated protection from killing by kanamycin and ampicillin

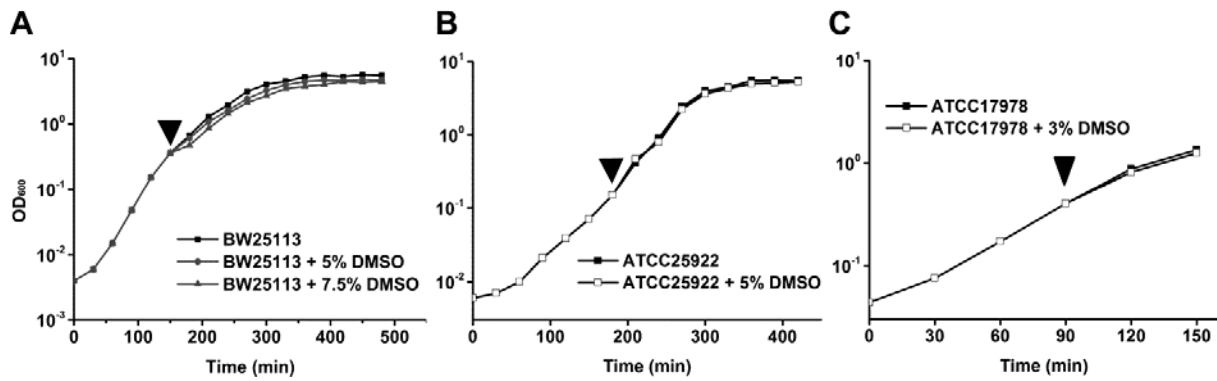

**Figure S1. DMSO has little effect on bacterial growth.** Exponentially growing cultures of *E. coli* (A and B) or *A. baumannii* (C) were grown in LB medium. At the indicated times (downward arrowheads), DMSO at 1/2 MIC (also at 1/3 MIC for panel A) was added to the culture. Cell growth was monitored as OD<sub>600</sub> for up to 8 h. DMSO at the concentrations used in the present work showed little effect on bacterial growth with all 3 strains.

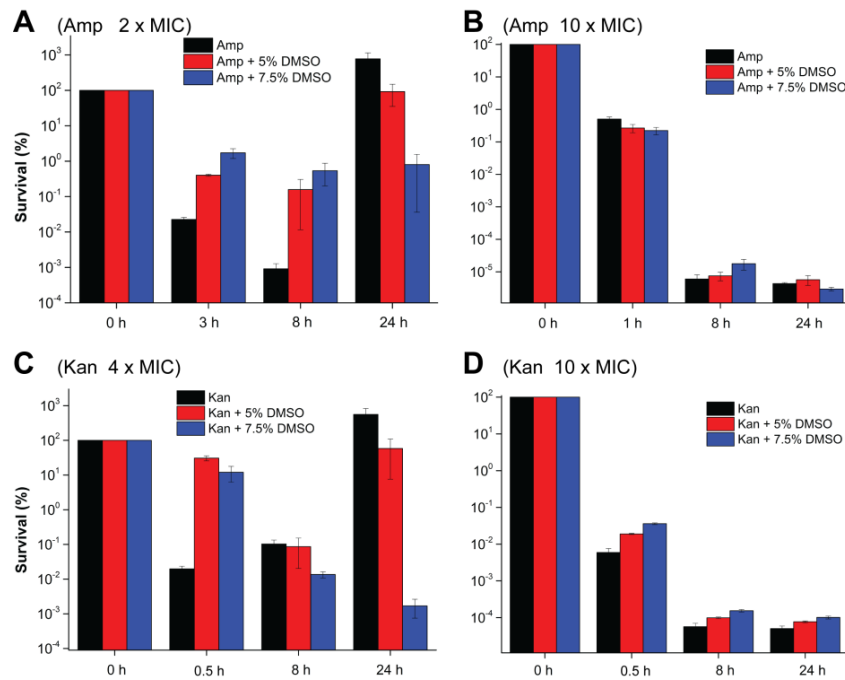

**Figure S2. Increased incubation time and drug concentration diminish DMSO-mediated protection from killing by kanamycin and ampicillin.** Exponentially growing cultures of *E. coli* strain BW25113 were treated with 16  $\mu\text{g/ml}$  ampicillin (2 x MIC, panel A), 80  $\mu\text{g/ml}$  ampicillin (10 x MIC, panel B), 4 x MIC kanamycin (24  $\mu\text{g/ml}$  in the absence and 12  $\mu\text{g/ml}$  in presence of DMSO, panel C), or 10 x MIC kanamycin (60  $\mu\text{g/ml}$  in the absence and 30  $\mu\text{g/ml}$  in presence of DMSO, panel D). In each panel DMSO was absent or present at 5% or 7.5% for the indicated times. The protective effect of DMSO on both kanamycin- and ampicillin-mediated killing dropped or disappeared as drug exposure time or concentration increased (compare panels A and B, or C and D). The regrowth in the 24-h samples of panels A and C may derive from drug-resistant mutants selected at the low drug concentrations and long incubation times used for these experiments. With ampicillin examined at various drug concentrations, no protection was observed at concentrations > 4 x MIC (not shown). Shown are the average values from experiments conducted at least three times. Error bars indicate standard error of the mean.
